# Supplementary material
Source: Springer Nature journal article supplement (https://www.springermedizin.de/resource/supplementary/12891_2007_384_MOESM1_ESM.pdf/9510928)
Supplement: MOESM1 [file 9510928]

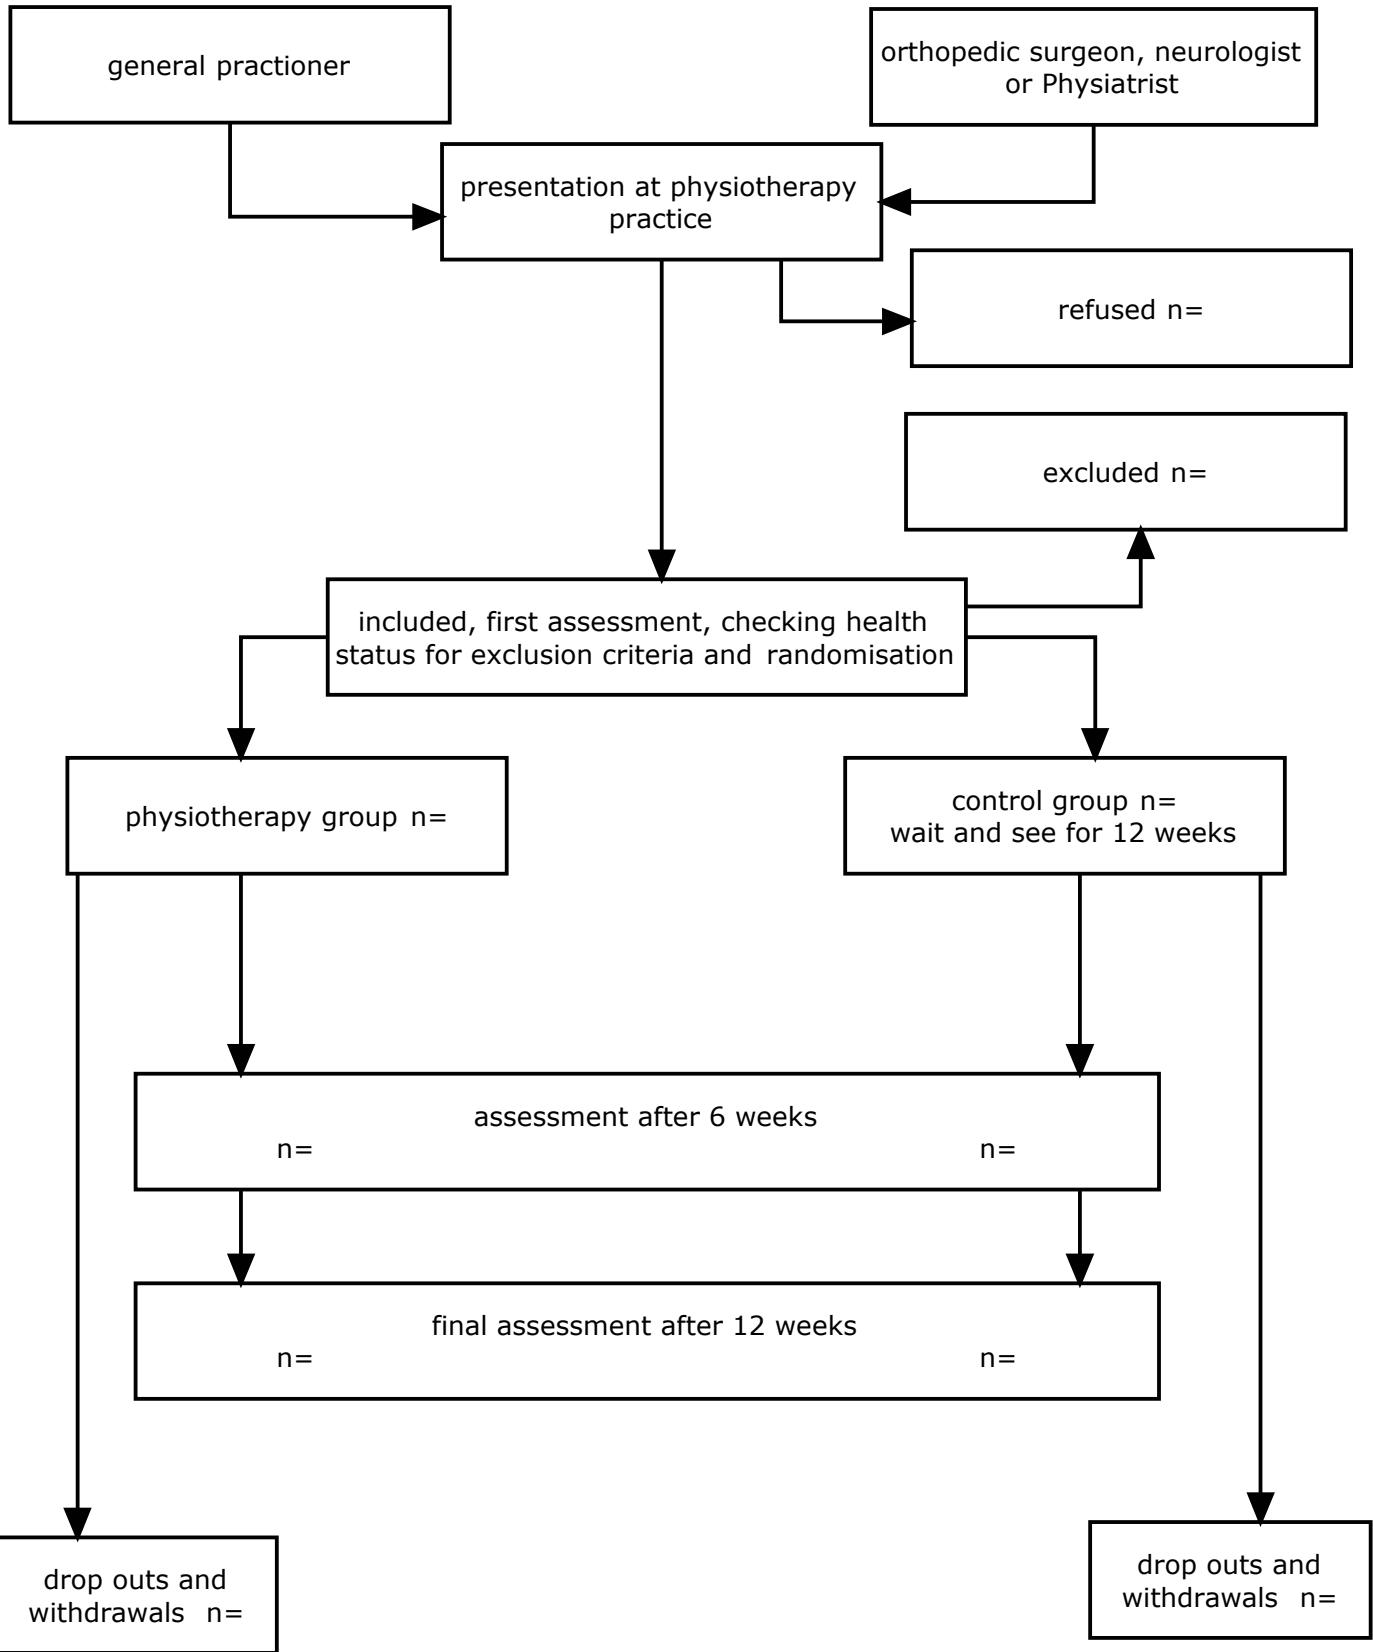

general practitioner

orthopedic surgeon, neurologist  
or Physiatrist

presentation at physiotherapy  
practice

refused n=

excluded n=

included, first assessment, checking health  
status for exclusion criteria and randomisation

physiotherapy group n=

control group n=  
wait and see for 12 weeks

n=

assessment after 6 weeks

n=

n=

final assessment after 12 weeks

n=

drop outs and  
withdrawals n=

drop outs and  
withdrawals n=
